# Supplementary material for: Thermochromism and X-ray detection capabilities of a hybrid double metal halide perovskite (C3H12N2)2AgBiBr8
Source: Royal Society of Chemistry journal article supplement (doi:10.1039/d6ce00175k), 2026-05-26
Supplement: d6ce00175k1.pdf [file d6ce00175k1.pdf]

# Supporting Information

## Thermochromism and X-ray Detection Capabilities of a Hybrid Double Metal Halide Perovskite (C<sub>3</sub>H<sub>12</sub>N<sub>2</sub>)<sub>2</sub>AgBiBr<sub>8</sub>

Kanika Parashar<sup>a</sup>, Tamanna Pinky<sup>a</sup>, Nobuyuki Yamamoto<sup>a</sup>, S. A. Keishana Navodye<sup>b</sup>, G.T. Kasun Kalhara Gunasooriya<sup>b</sup>, Mark D. Smith<sup>c</sup>, Bayram Saparov<sup>a\*</sup>

<sup>a</sup>Department of Chemistry & Biochemistry, The University of Oklahoma, Norman, Oklahoma 73019-5251, United States

<sup>b</sup>School of Sustainable Chemical, Biological and Materials Engineering, The University of Oklahoma, Norman, Oklahoma 73019-5251, United States

<sup>c</sup>Department of Chemistry and Biochemistry, University of South Carolina, Columbia, South Carolina 29208, United States

\*Author to whom correspondence should be addressed: [saparov@ou.edu](mailto:saparov@ou.edu)

**Table S1.** Selected single crystal data and structure refinement parameters for  $(C_3H_{12}N_2)_2AgBiBr_8$  at low temperature (100 K) and high-temperature (400 K).

| Formula                                          | $(C_3H_{12}N_2)_2AgBiBr_8$                                                           |                                                                                       |
|--------------------------------------------------|--------------------------------------------------------------------------------------|---------------------------------------------------------------------------------------|
| Formula weight (g/mol)                           | 1108.42                                                                              | 1108.42                                                                               |
| Temperature (K)                                  | 100(2)                                                                               | 400(2)                                                                                |
| Radiation, wavelength (Å)                        | MoK $\alpha$ ( $\lambda = 0.71073$ )                                                 | MoK $\alpha$ ( $\lambda = 0.71073$ )                                                  |
| Crystal system                                   | Monoclinic                                                                           | Monoclinic                                                                            |
| Space group                                      | $P2_1/n$                                                                             | $C2/m$                                                                                |
| $Z$                                              | 2                                                                                    | 2                                                                                     |
| Unit cell parameters (Å)                         | $a = 8.3736(3)$<br>$b = 7.6960(3)$<br>$c = 18.2768(7)$<br>$\beta = 99.008(10)^\circ$ | $a = 18.9998(15)$<br>$b = 7.8787(7)$<br>$c = 8.3765(8)$<br>$\beta = 107.287(3)^\circ$ |
| Volume (Å <sup>3</sup> )                         | 1163.29(8)                                                                           | 1197.27(18)                                                                           |
| Density (g/cm <sup>3</sup> )                     | 3.164                                                                                | 3.075                                                                                 |
| Absorption coefficient ( $\mu/\text{mm}^{-1}$ )  | 22.131                                                                               | 21.503                                                                                |
| 2 $\theta$ range for data collection/ $^\circ$   | 5.086 to 56.654                                                                      | 2.547 to 27.098                                                                       |
| Reflections collected                            | 24212                                                                                | 11483                                                                                 |
| Independent reflections                          | 2902 [ $R_{\text{int}} = 0.0634$ , $R_{\text{sigma}} = 0.0373$ ]                     | 1415 [ $R_{\text{int}} = 0.0449$ ]                                                    |
| Final R indexes [ $I \geq 2\sigma(I)$ ]          | $R_1 = 0.0372$<br>$wR_2 = 0.1005$                                                    | $R_1 = 0.0240$<br>$wR_2 = 0.0579$                                                     |
| Final R indexes [all data]                       | $R_1 = 0.0390$<br>$wR_2 = 0.1019$                                                    | $R_1 = 0.0264$<br>$wR_2 = 0.0598$                                                     |
| Goodness-of-fit on $F^2$                         | 1.054                                                                                | 1.054                                                                                 |
| Largest diff. peak and hole ( $e^-/\text{Å}^3$ ) | 3.34 and -1.53                                                                       | 0.518 and -0.727                                                                      |

$$R_1 = \frac{\sum ||F_0| - |F_c||}{\sum |F_0|}; wR_2 = \frac{|\Sigma|w(F_0^2 - F_c^2)^2|}{\sum |wF_0^{22}|_{1/2}}$$

where  $w = 1/|\sigma^2 F_0^2 + (AP)^2 + BP|$ , with  $P = (F_0^2 + 2F_c^2)/3$  and weight coefficients A and B

**Table S2.** Fractional atomic coordinates ( $\times 10^4$ ) and equivalent isotropic displacement parameters ( $U_{eq}^a$ ) ( $\text{\AA}^2 \times 10^3$ ) for  $(C_3H_{12}N_2)_2AgBiBr_8$  at 100 K.

| Atom | <i>x</i>  | <i>y</i>  | <i>z</i>  | $U_{eq}$  |
|------|-----------|-----------|-----------|-----------|
| Bi1  | 5000      | 5000      | 0         | 17.83(12) |
| Ag1  | 0         | 0         | 0         | 23.17(16) |
| Br1  | 1039.0(7) | 167.5(7)  | 1426.8(3) | 23.72(15) |
| Br2  | 2223.2(6) | 2858.8(7) | -338.1(3) | 23.76(15) |
| Br3  | 4622.4(7) | 5136.9(7) | 1525.3(3) | 23.03(16) |
| Br4  | 7062.2(6) | 2075.1(7) | 268.9(3)  | 22.72(15) |
| N1   | 619(6)    | 4454(7)   | 1234(3)   | 25.2(9)   |
| N2   | 6(6)      | 4622(7)   | 3639(3)   | 25.7(10)  |
| C1   | 549(8)    | 5152(7)   | 1986(4)   | 25.7(12)  |
| C2   | -933(6)   | 4415(7)   | 2275(3)   | 22.9(10)  |
| C3   | -1209(8)  | 5223(8)   | 3003(4)   | 26.4(12)  |

<sup>a</sup> $U_{eq}$  is defined as one third of the trace of the orthogonalized  $U_{ij}$  tensor.

**Table S3.** Fractional atomic coordinates ( $\times 10^4$ ) and equivalent isotropic displacement parameters ( $U_{eq}^a$ ) ( $\text{\AA}^2 \times 10^3$ ) for  $(C_3H_{12}N_2)_2AgBiBr_8$  at 400 K.

| Atom | <i>x</i> | <i>y</i>  | <i>z</i>  | $U_{eq}$ |
|------|----------|-----------|-----------|----------|
| Bi1  | 5000     | 10000     | 5000      | 50(1)    |
| Ag1  | 5000     | 5000      | 0         | 68(1)    |
| Br1  | 6419(1)  | 5000      | 446(1)    | 94(1)    |
| Br2  | 5257(1)  | 7495(1)   | 2833(1)   | 108(1)   |
| Br3  | 3471(1)  | 10000     | 3186(1)   | 87(1)    |
| N1A  | 3680(30) | 4580(160) | 3370(120) | 85(7)    |
| N2A  | 1280(40) | 4200(130) | 610(90)   | 78(10)   |
| N1   | 3689(10) | 4770(80)  | 3690(30)  | 85(7)    |
| N2   | 1242(13) | 4660(20)  | 660(30)   | 78(10)   |
| C1   | 3028(7)  | 5270(40)  | 4187(18)  | 79(6)    |
| C2   | 2340(7)  | 4464(18)  | 3112(16)  | 74(4)    |
| C3   | 2004(8)  | 5310(30)  | 1474(16)  | 86(6)    |
| C1A  | 3080(20) | 5600(80)  | 3720(50)  | 78(7)    |
| C2A  | 2400(20) | 5660(50)  | 2300(50)  | 75(6)    |
| C3A  | 1830(20) | 4370(60)  | 2270(50)  | 89(7)    |

<sup>a</sup> $U_{eq}$  is defined as one third of the trace of the orthogonalized  $U_{ij}$  tensor.

**Table S4.** Selected bond distances and angles in  $(\text{C}_3\text{H}_{12}\text{N}_2)_2\text{AgBiBr}_8$  at 100 K.

| Atom pair              | Distance (Å) | Label                                     | Angle (°)  |
|------------------------|--------------|-------------------------------------------|------------|
| Bi1 – Br2 <sup>1</sup> | 2.8379(5)    | Br2 <sup>1</sup> – Bi1 – Br2              | 180.0      |
| Bi1 – Br2              | 2.8379(5)    | Br2 <sup>1</sup> – Bi1 – Br3 <sup>1</sup> | 91.251(16) |
| Bi1 – Br3 <sup>1</sup> | 2.8562(6)    | Br2 – Bi1 – Br3                           | 91.250(16) |
| Bi1 – Br3              | 2.8563(6)    | Br2 <sup>1</sup> – Bi1 – Br3              | 88.749(16) |
| Bi1 – Br4 <sup>1</sup> | 2.8328(5)    | Br2 – Bi1 – Br3 <sup>1</sup>              | 88.750(16) |
| Bi1 – Br4              | 2.8328(5)    | Br3 <sup>1</sup> – Bi1 – Br3              | 180.0      |
| Ag1 – Br1 <sup>2</sup> | 2.6197(6)    | Br4 – Bi1 – Br2                           | 91.879(14) |
| Ag1 – Br1              | 2.6198(6)    | Br4 <sup>1</sup> – Bi1 – Br2 <sup>1</sup> | 91.879(14) |
| Ag1 – Br2              | 3.0080(5)    | Br4 <sup>1</sup> – Bi1 – Br2              | 88.121(14) |
| Ag1 – Br2 <sup>2</sup> | 3.0081(5)    | Br4 – Bi1 – Br2 <sup>1</sup>              | 88.121(14) |
| Ag1 – Br4 <sup>3</sup> | 3.0367(5)    | Br4 <sup>1</sup> – Bi1 – Br3              | 88.989(15) |
| Ag1–Br4 <sup>4</sup>   | 3.0367(5)    | Br4 <sup>2</sup> – Bi1 – Br3 <sup>1</sup> | 91.010(15) |
| N1 – C1                | 1.486(8)     | Br4 – Bi1 – Br3 <sup>1</sup>              | 88.991(15) |
| N2 – C3                | 1.494(8)     | Br4 – Bi1 – Br3                           | 91.009(15) |
| C1 – C2                | 1.531(8)     | Br4 <sup>1</sup> – Bi1 – Br4              | 180.0      |
| C2 – C3                | 1.520(8)     | Br1 <sup>2</sup> – Ag1 – Br1              | 180.0      |
|                        |              | Br1 – Ag1 – Br2                           | 92.795(16) |
|                        |              | Br1 <sup>2</sup> – Ag1 – Br2 <sup>2</sup> | 92.796(16) |
|                        |              | Br1 <sup>2</sup> – Ag1 – Br2              | 87.205(16) |
|                        |              | Br1 – Ag1 – Br2 <sup>2</sup>              | 87.204(16) |
|                        |              | Br1 <sup>2</sup> – Ag1 – Br4 <sup>3</sup> | 87.950(16) |
|                        |              | Br1 – Ag1 – Br4 <sup>3</sup>              | 92.050(16) |
|                        |              | Br1 <sup>2</sup> – Ag1 – Br4 <sup>4</sup> | 92.050(16) |
|                        |              | Br1 – Ag1 – Br4 <sup>4</sup>              | 87.950(16) |
|                        |              | Br2 – Ag1 – Br2 <sup>2</sup>              | 180.0      |
|                        |              | Br2 <sup>2</sup> – Ag1 – Br4 <sup>4</sup> | 78.951(14) |

|                                           |             |
|-------------------------------------------|-------------|
| Br2 – Ag1 – Br4 <sup>4</sup>              | 101.049(14) |
| Br2 – Ag1 – Br4 <sup>3</sup>              | 78.951(14)  |
| Br2 <sup>2</sup> – Ag1 – Br4 <sup>3</sup> | 101.049(14) |
| Br4 <sup>3</sup> – Ag1 – Br4 <sup>4</sup> | 180.00(2)   |
| Bi1 – Br2 – Ag1                           | 153.16(2)   |
| Bi1 – Br4 – Ag1 <sup>5</sup>              | 151.29(2)   |
| N1 – C1 – C2                              | 109.6(5)    |
| C3 – C2 – C1                              | 113.1(5)    |
| N2 – C3 – C2                              | 112.1(5)    |

Here, <sup>1</sup>1-X, 1-Y, -Z; <sup>2</sup>1-X, -Y, -Z; <sup>3</sup>1-X, -Y, -Z; <sup>4</sup>-1+X, +Y, +Z; <sup>5</sup>1+X, +Y, +Z

**Table S5.** Selected bond distances and angles in  $(\text{C}_3\text{H}_{12}\text{N}_2)_2\text{AgBiBr}_8$  at 400 K.

| Atom pair              | Distance (Å) | Label                                     | Angle (°) |
|------------------------|--------------|-------------------------------------------|-----------|
| Bi1 – Br2 <sup>4</sup> | 2.8204(5)    | Br2 – Bi1 – Br2 <sup>6</sup>              | 180.00(3) |
| Bi1 – Br2              | 2.8204(5)    | Br2 – Bi1 – Br2 <sup>5</sup>              | 88.80(4)  |
| Bi1 – Br2 <sup>6</sup> | 2.8204(5)    | Br2 <sup>4</sup> – Bi1 – Br2 <sup>6</sup> | 88.80(4)  |
| Bi1 – Br2 <sup>5</sup> | 2.8204(5)    | Br2 <sup>4</sup> -Bi1-Br2 <sup>5</sup>    | 180.0     |
| Bi1 – Br3              | 2.8501(8)    | Br2 <sup>4</sup> -Bi1-Br3 <sup>6</sup>    | 90.03(2)  |
| Bi1 – Br3 <sup>6</sup> | 2.8502(8)    | Br2 <sup>4</sup> -Bi1-Br3                 | 89.97(2)  |
| Ag1 – Br2 <sup>1</sup> | 3.0075(6)    | Br2 <sup>6</sup> -Bi1-Br3                 | 89.97(2)  |
| Ag1 – Br1              | 2.6101(8)    | Br2-Bi1-Br3 <sup>6</sup>                  | 89.97(2)  |
| Ag1 – Br2              | 3.0075(6)    | Bi1-Br2-Ag1                               | 161.20(3) |
| Ag1 – Br2 <sup>3</sup> | 3.0075(6)    | Br2 <sup>6</sup> -Bi1-Br2 <sup>5</sup>    | 91.20(4)  |
| Ag1 – Br2 <sup>2</sup> | 3.0075(6)    | Br2-Bi1-Br2 <sup>4</sup>                  | 91.20(4)  |
| Ag1-Br1 <sup>1</sup>   | 3.0075(6)    | Br2-Bi1-Br3                               | 90.03(2)  |
| N1 – C1                | 1.488(19)    | Br2 <sup>5</sup> -Bi1-Br3 <sup>6</sup>    | 89.97(2)  |
| N2 – C3                | 1.50(2)      | Br2 <sup>6</sup> -Bi1-Br3 <sup>6</sup>    | 90.03(2)  |
| C1 – C2                | 1.491(15)    | Br2 <sup>5</sup> -Bi1-Br3                 | 90.03(2)  |
| C2 – C3                | 1.487(15)    | Br3-Bi1-Br3 <sup>6</sup>                  | 180.0     |
|                        |              | Br1 <sup>1</sup> -Ag1-Br1                 | 180.0     |
|                        |              | Br1-Ag1-Br2 <sup>3</sup>                  | 88.20(2)  |
|                        |              | Br1-Ag1-Br2                               | 88.21(2)  |
|                        |              | Br1 <sup>1</sup> -Ag1-Br2 <sup>1</sup>    | 88.20(2)  |
|                        |              | Br1-Ag1-Br2 <sup>2</sup>                  | 91.80(2)  |
|                        |              | Br2 <sup>1</sup> -Ag1-Br2 <sup>2</sup>    | 81.64(3)  |
|                        |              | Br2 <sup>1</sup> -Ag1-Br2 <sup>3</sup>    | 98.36(3)  |
|                        |              | Br2 <sup>2</sup> -Ag1-Br2                 | 98.36(3)  |
|                        |              | Br1 <sup>1</sup> -Ag1-Br2 <sup>2</sup>    | 88.20(2)  |
|                        |              | Br1 <sup>1</sup> -Ag1-Br2                 | 91.79(2)  |

|                                        |           |
|----------------------------------------|-----------|
| Br1-Ag1-Br2 <sup>1</sup>               | 91.80(2)  |
| Br1 <sup>1</sup> -Ag1-Br2 <sup>3</sup> | 91.80(2)  |
| Br2 <sup>3</sup> -Ag1-Br2 <sup>2</sup> | 180.00(3) |
| Br2 <sup>3</sup> -Ag1-Br2              | 81.64(3)  |
| Br2 <sup>1</sup> -Ag1-Br2              | 180.0     |
| C2 – C3 – N2                           | 111.0(16) |
| N1 – C1 – C2                           | 112.4(18) |
| C3 – C2 – C1                           | 115.3(14) |

Here, <sup>1</sup>-X+1, -Y+1, -Z; <sup>2</sup>-X+1, Y, -Z; <sup>3</sup>X, -Y+1, Z; <sup>4</sup>-X+1, Y, -Z+1; <sup>5</sup>X, -Y+2, Z; <sup>6</sup>-X+1, -Y+2, -Z+1

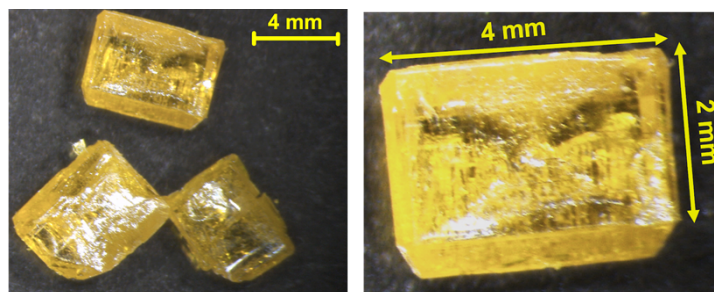

**Fig. S1** Images of  $(\text{C}_3\text{H}_{12}\text{N}_2)_2\text{AgBiBr}_8$  crystals synthesized using the slow evaporation growth method.

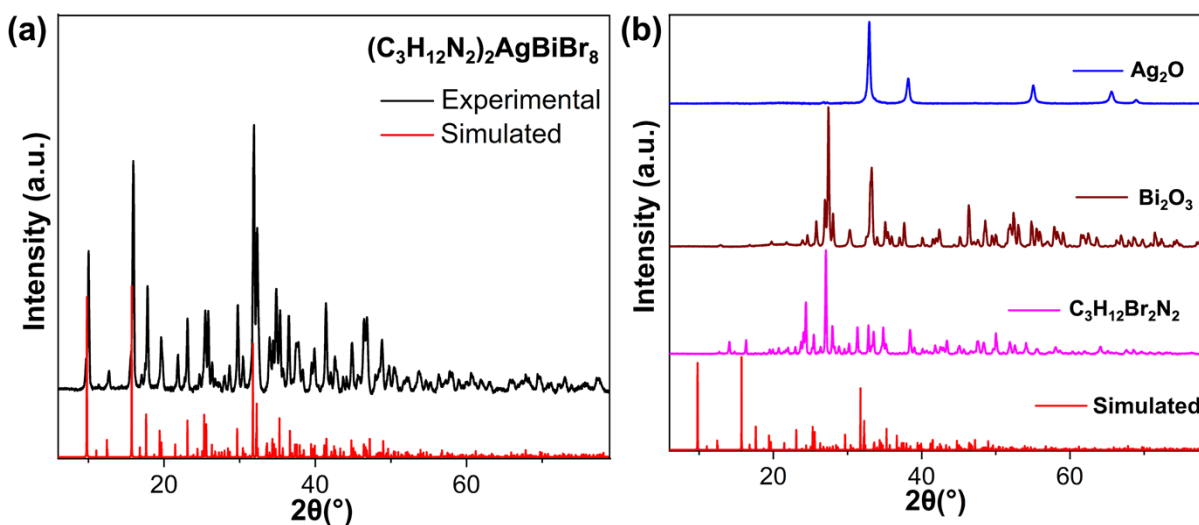

**Fig. S2** Comparison of simulated diffraction data (in red) of  $(\text{C}_3\text{H}_{12}\text{N}_2)_2\text{AgBiBr}_8$  with its (a) room temperature PXRD pattern (in black). (b)  $(\text{C}_3\text{H}_{12}\text{N}_2)_2\text{AgBiBr}_8$  is obtained as a phase pure sample no  $\text{Ag}_2\text{O}$  (blue),  $\text{Bi}_2\text{O}_3$  (wine), and  $\text{C}_3\text{H}_{12}\text{Br}_2\text{N}_2$  (pink) impurities are detected.

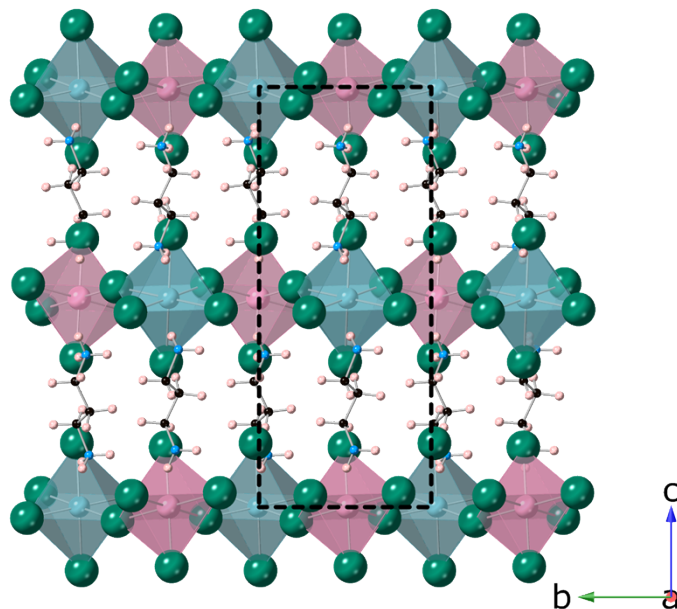

**Fig. S3** Layered crystal structure of  $(\text{C}_3\text{H}_{12}\text{N}_2)_2\text{AgBiBr}_8$  is depicted. Silver, bismuth, bromine, nitrogen, carbon and hydrogen are represented by pink, bluish-green, green, blue, black and peach spheres, respectively.

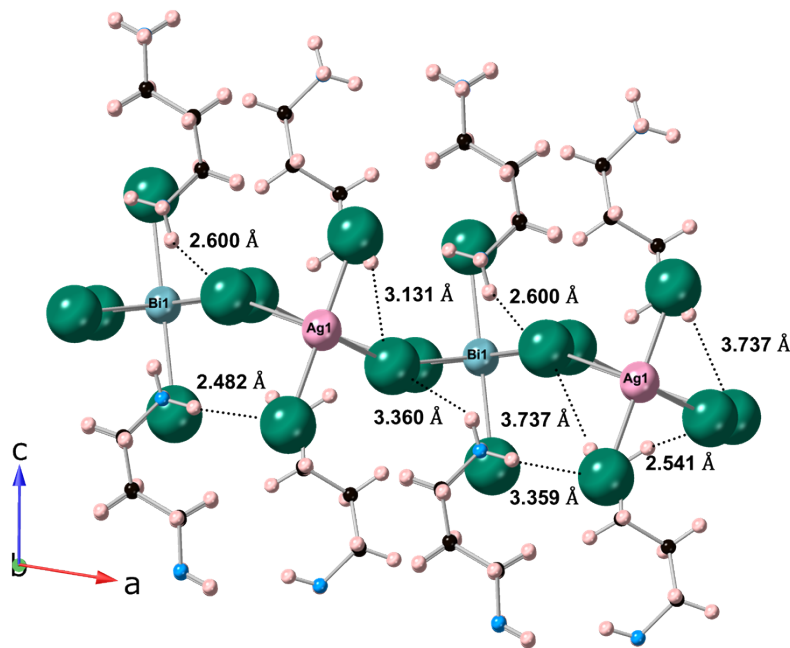

**Fig. S4** Hydrogen bonding network between a 2D  $[\text{AgBiBr}_8]^{4-}$  layer and intervening  $[\text{C}_3\text{H}_{12}\text{N}_2]^{2+}$  cations within the crystal structure of  $(\text{C}_3\text{H}_{12}\text{N}_2)_2\text{AgBiBr}_8$  is depicted. Silver, bismuth, bromine, nitrogen, carbon, and hydrogen are denoted by pink, bluish-green, green, blue, black and peach spheres, respectively.

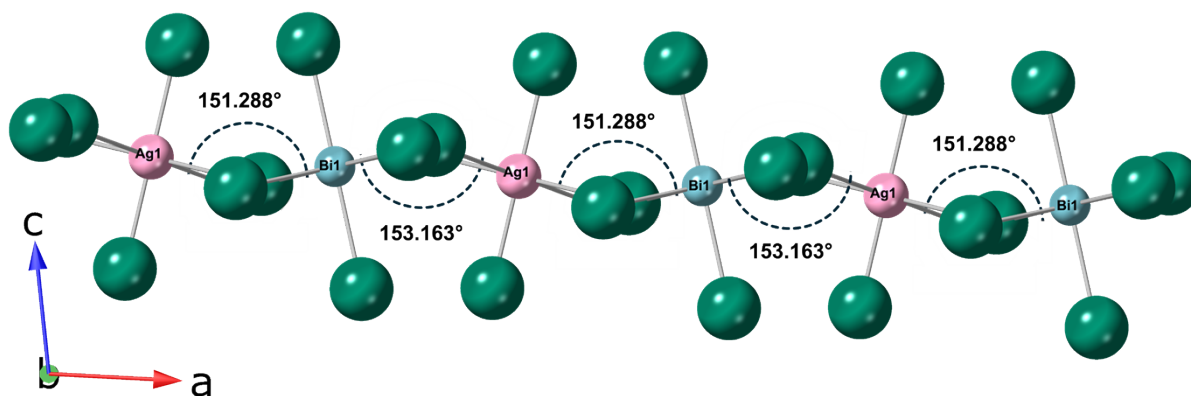

**Fig. S5** The bridging Ag-Br-Bi and Bi-Br-Ag angles within the inorganic layers the in-plane direction shows considerable tilting. Silver, bismuth and bromine are denoted by pink, bluish-green and green spheres, respectively.

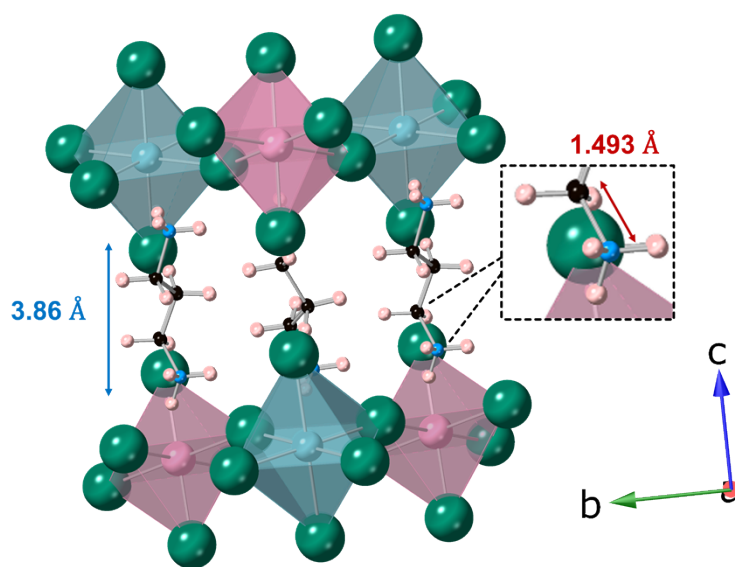

**Fig. S6** Interlayer spacing and penetration depth of the organic cations in  $(C_3H_{12}N_2)_2AgBiBr_8$ . Silver, bismuth, bromine, nitrogen, carbon, and hydrogen are denoted by pink, bluish-green, green, blue, black and peach spheres, respectively.

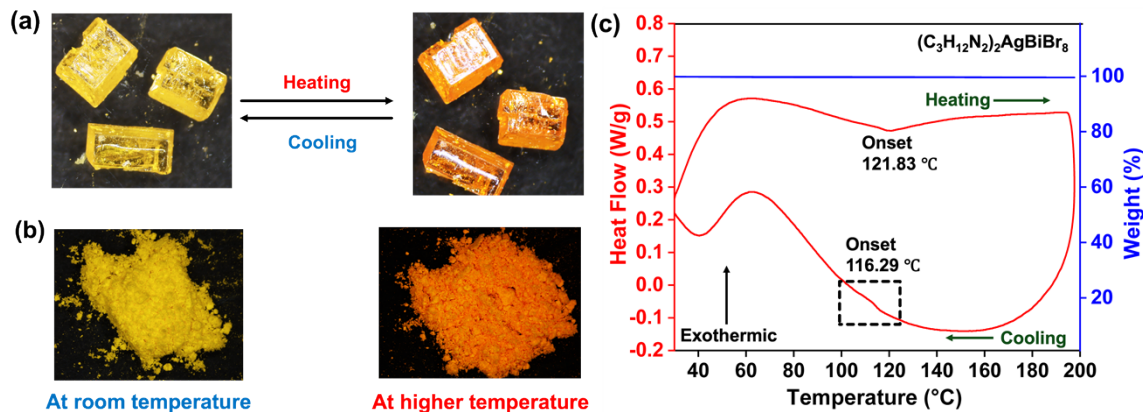

**Fig. S7**  $(C_3H_{12}N_2)_2AgBiBr_8$  sample shows reversible color changes during heating-cooling cycles: (a) single crystals and (b) polycrystalline powders. (c) Thermogravimetric Analysis (TGA, blue) and Differential Scanning Calorimetry (DSC, red) curves from 30 $^{\circ}C$  to 200 $^{\circ}C$ .

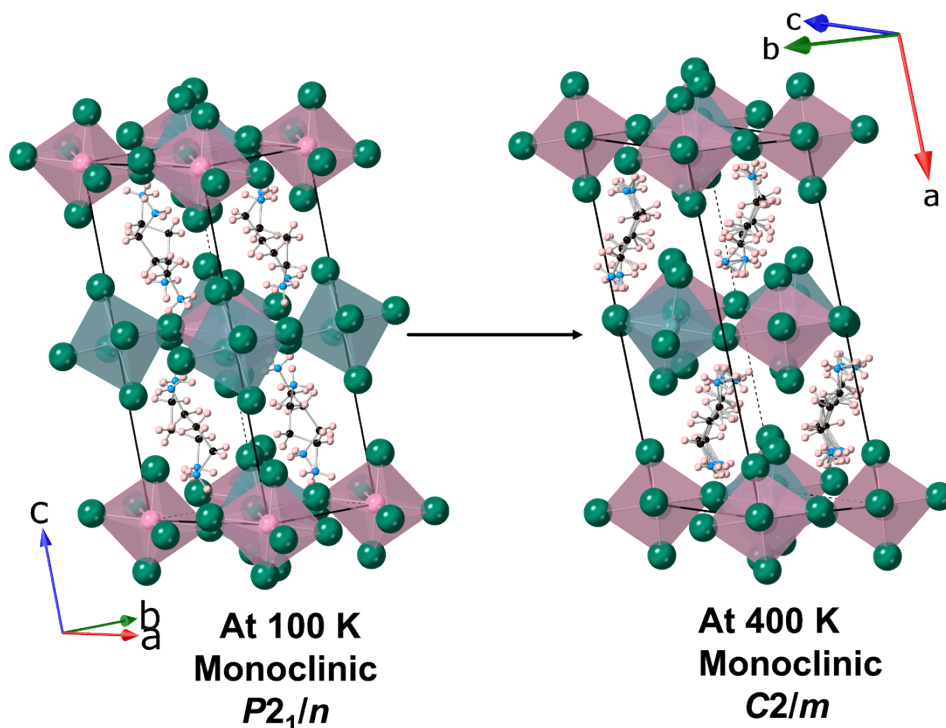

**Fig. S8** Crystal structures of  $(C_3H_{12}N_2)_2AgBiBr_8$  below (100 K) and above (400 K) the transition temperature. Silver, bismuth, bromine, nitrogen, carbon and hydrogen are represented by pink, bluish-green, green, blue, black and peach spheres, respectively.

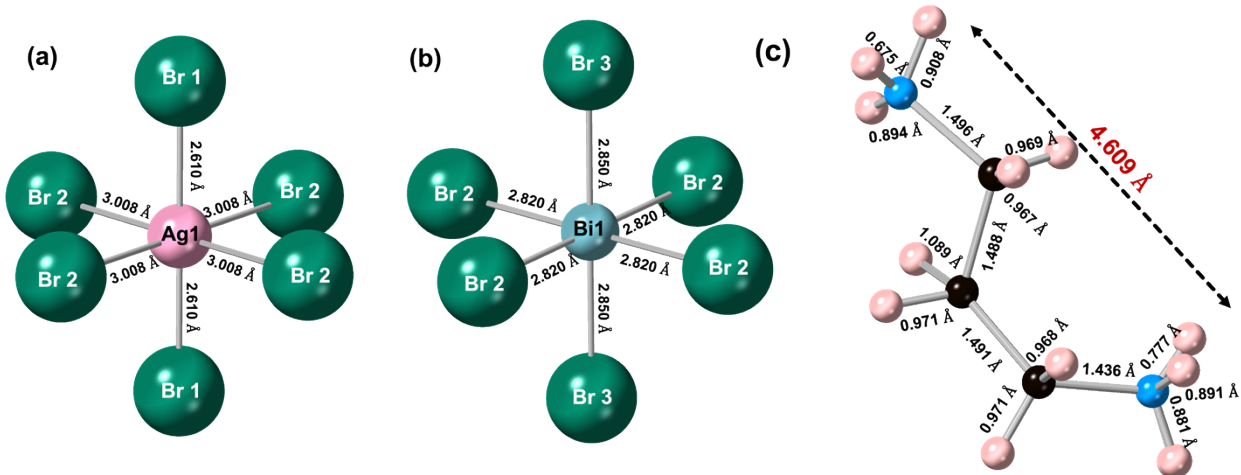

**Fig. S9** Interatomic distances in the coordination environments of (a) silver and (b) bismuth, and (c) in the organic  $C_3H_{12}N_2^{2+}$  cation at 400 K. Silver, bismuth, bromine, nitrogen, carbon and hydrogen are represented by pink, bluish-green, green, blue, black and peach spheres, respectively.

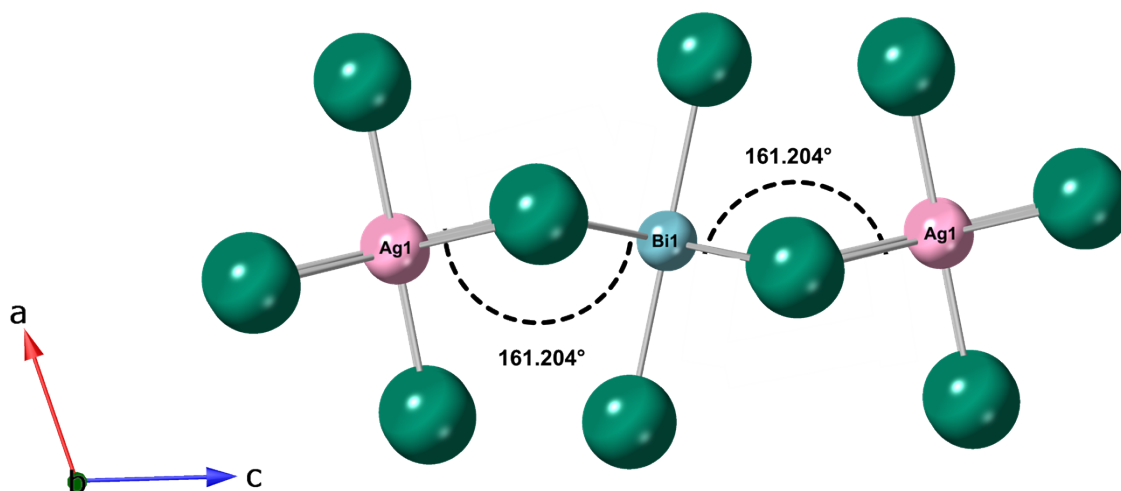

**Fig. S10** The bridging Ag-Br-Bi and Bi-Br-Ag angles within the inorganic layers the in-plane direction shows reduced tilting at 400 K. Silver, bismuth, bromine are denoted by pink, bluish-green and green spheres, respectively.

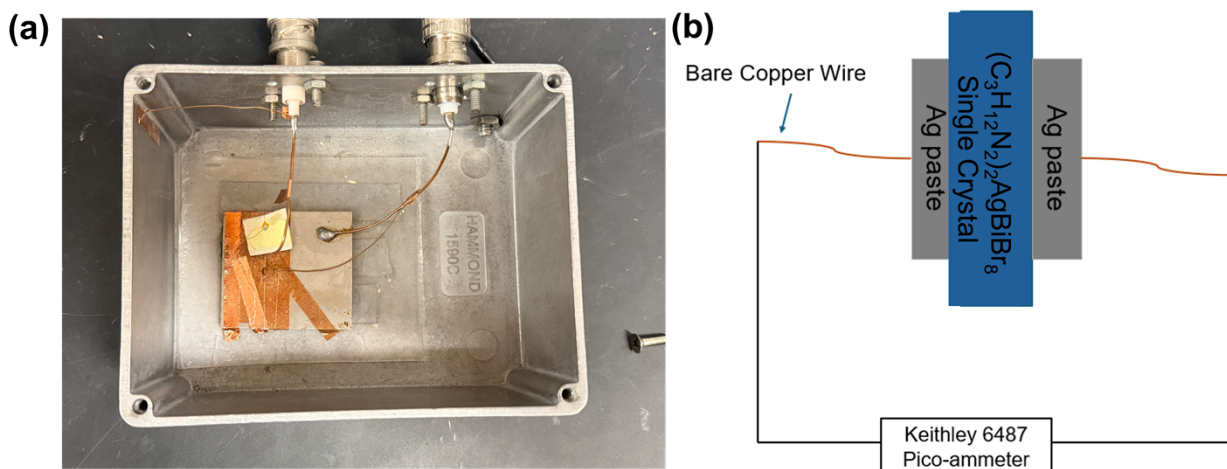

**Fig. S11** (a) Set-up used for electrical measurements. (b) Schematic depiction of fabricated prototype detector based on single crystal of  $(\text{C}_3\text{H}_{12}\text{N}_2)_2\text{AgBiBr}_8$ .

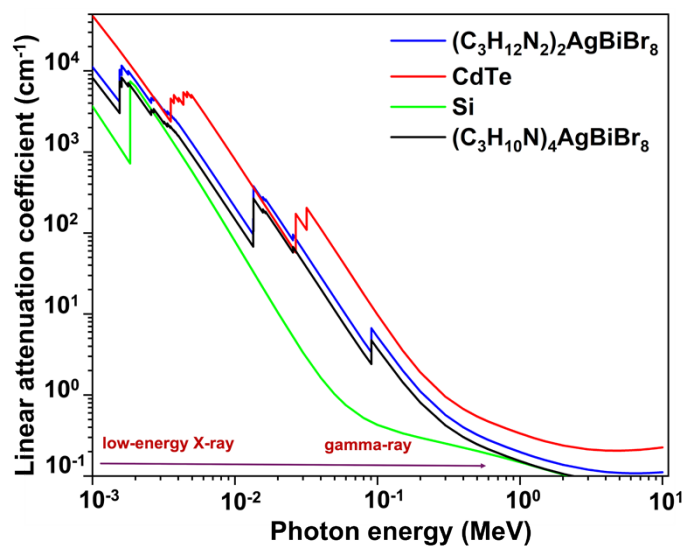

**Fig. S12** Photon attenuation capability comparison plot for  $(\text{C}_3\text{H}_{12}\text{N}_2)_2\text{AgBiBr}_8$ , CdTe, Si and  $(\text{C}_3\text{H}_{10}\text{N})_4\text{AgBiBr}_8$  against soft low-energy X-rays and high-energy gamma rays.

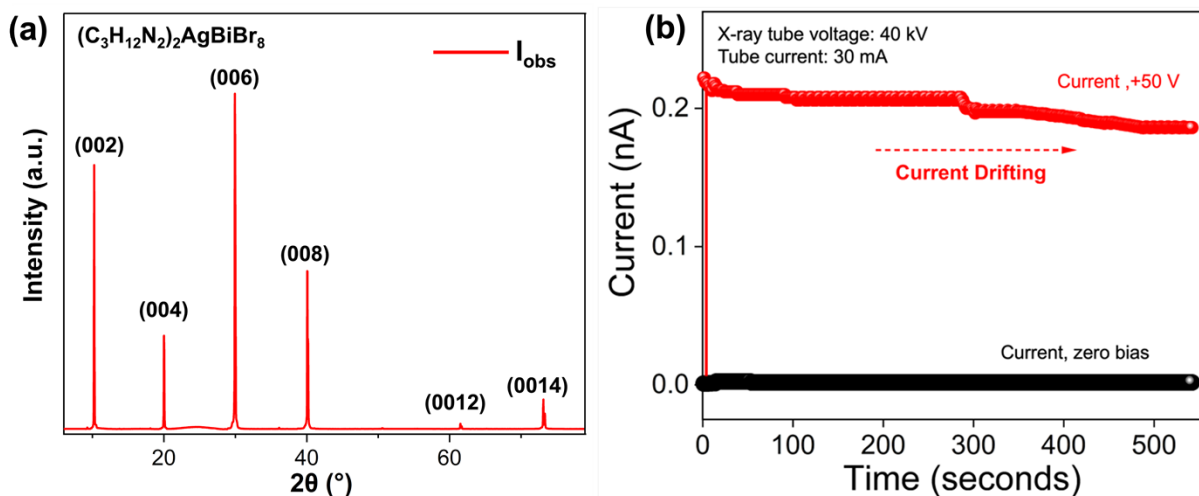

**Fig. S13** (a) An indexed room temperature PXRD pattern of a single crystal of  $(C_3H_{12}N_2)_2AgBiBr_8$  used for characterization of X-ray detection properties. (b) Long-term detector operational stability testing under continuous X-ray irradiation for ten minutes.
