# Supplementary figures and images for: Thermochromism and X-ray detection capabilities of a hybrid double metal halide perovskite (C3H12N2)2AgBiBr8
Source: Royal Society of Chemistry journal article supplement (doi:10.1039/d6ce00175k), 2026-05-26

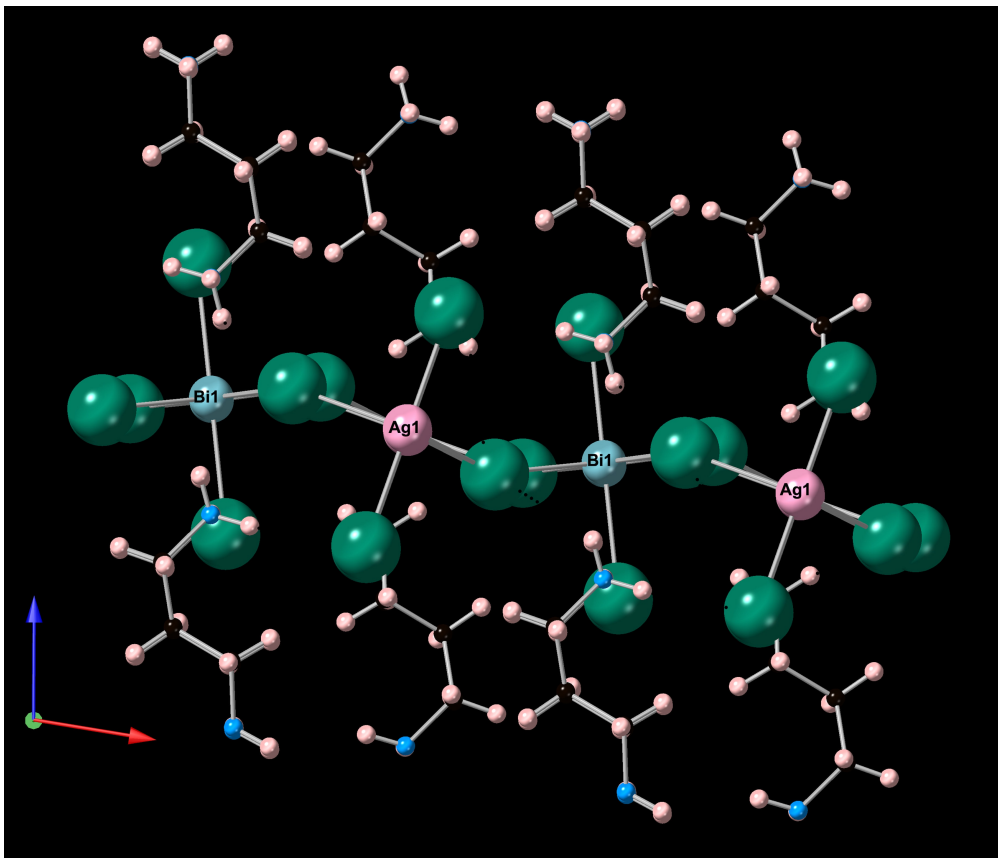

Supplement: d6ce00175k10.pdf [file d6ce00175k10.pdf]

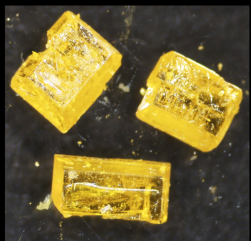

Heating

Cooling

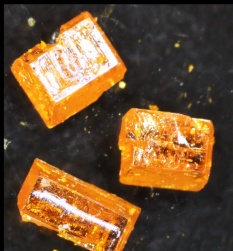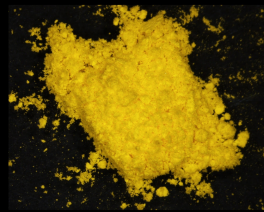

At room temperature

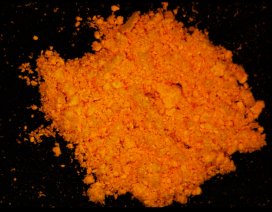

At higher temperature

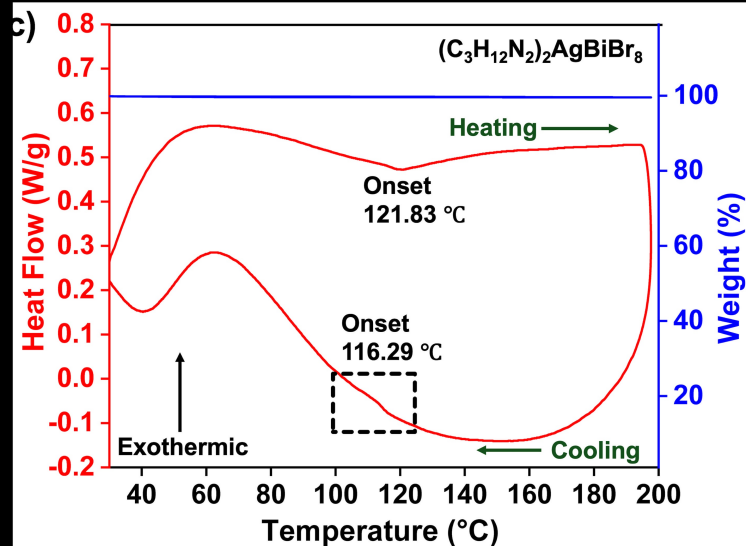

Supplement: d6ce00175k13.pdf [file d6ce00175k13.pdf]

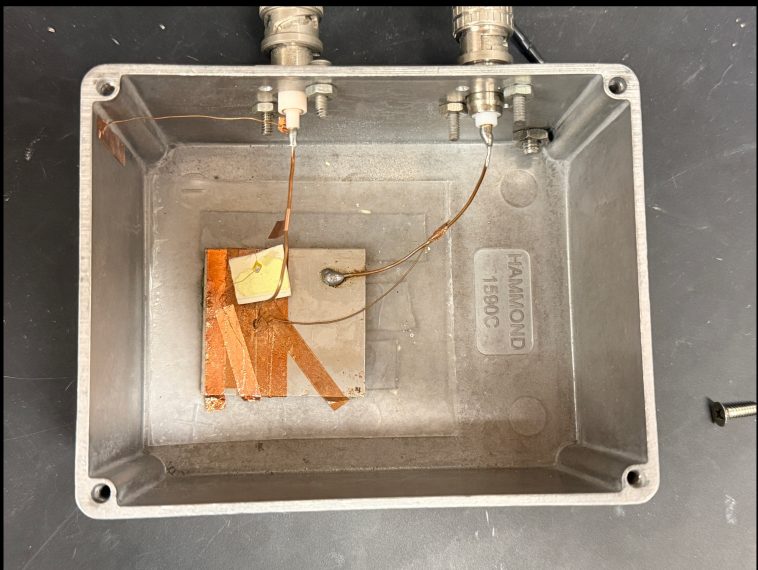

**(b)**

Bare Copper Wire

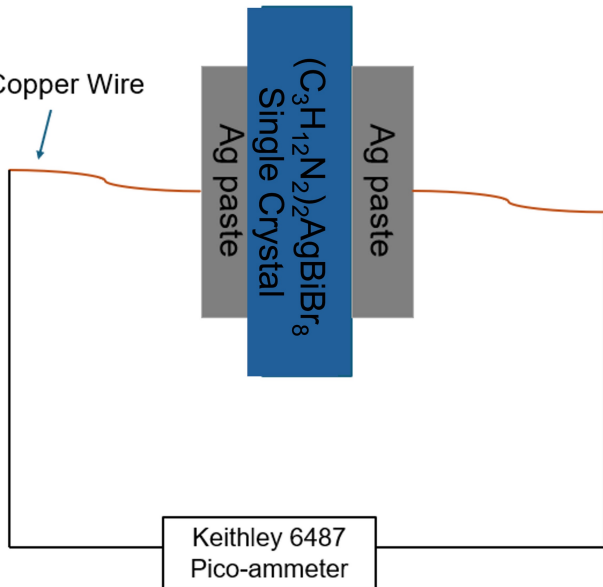

Supplement: d6ce00175k5.pdf [file d6ce00175k5.pdf]

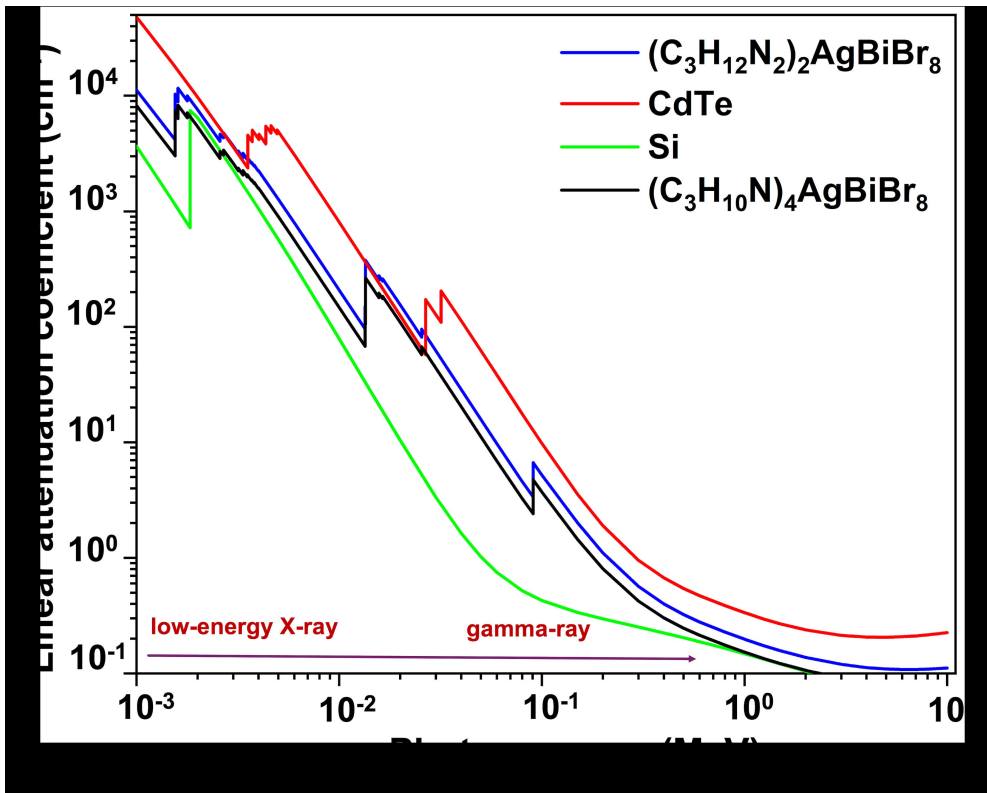

Supplement: d6ce00175k6.pdf [file d6ce00175k6.pdf]

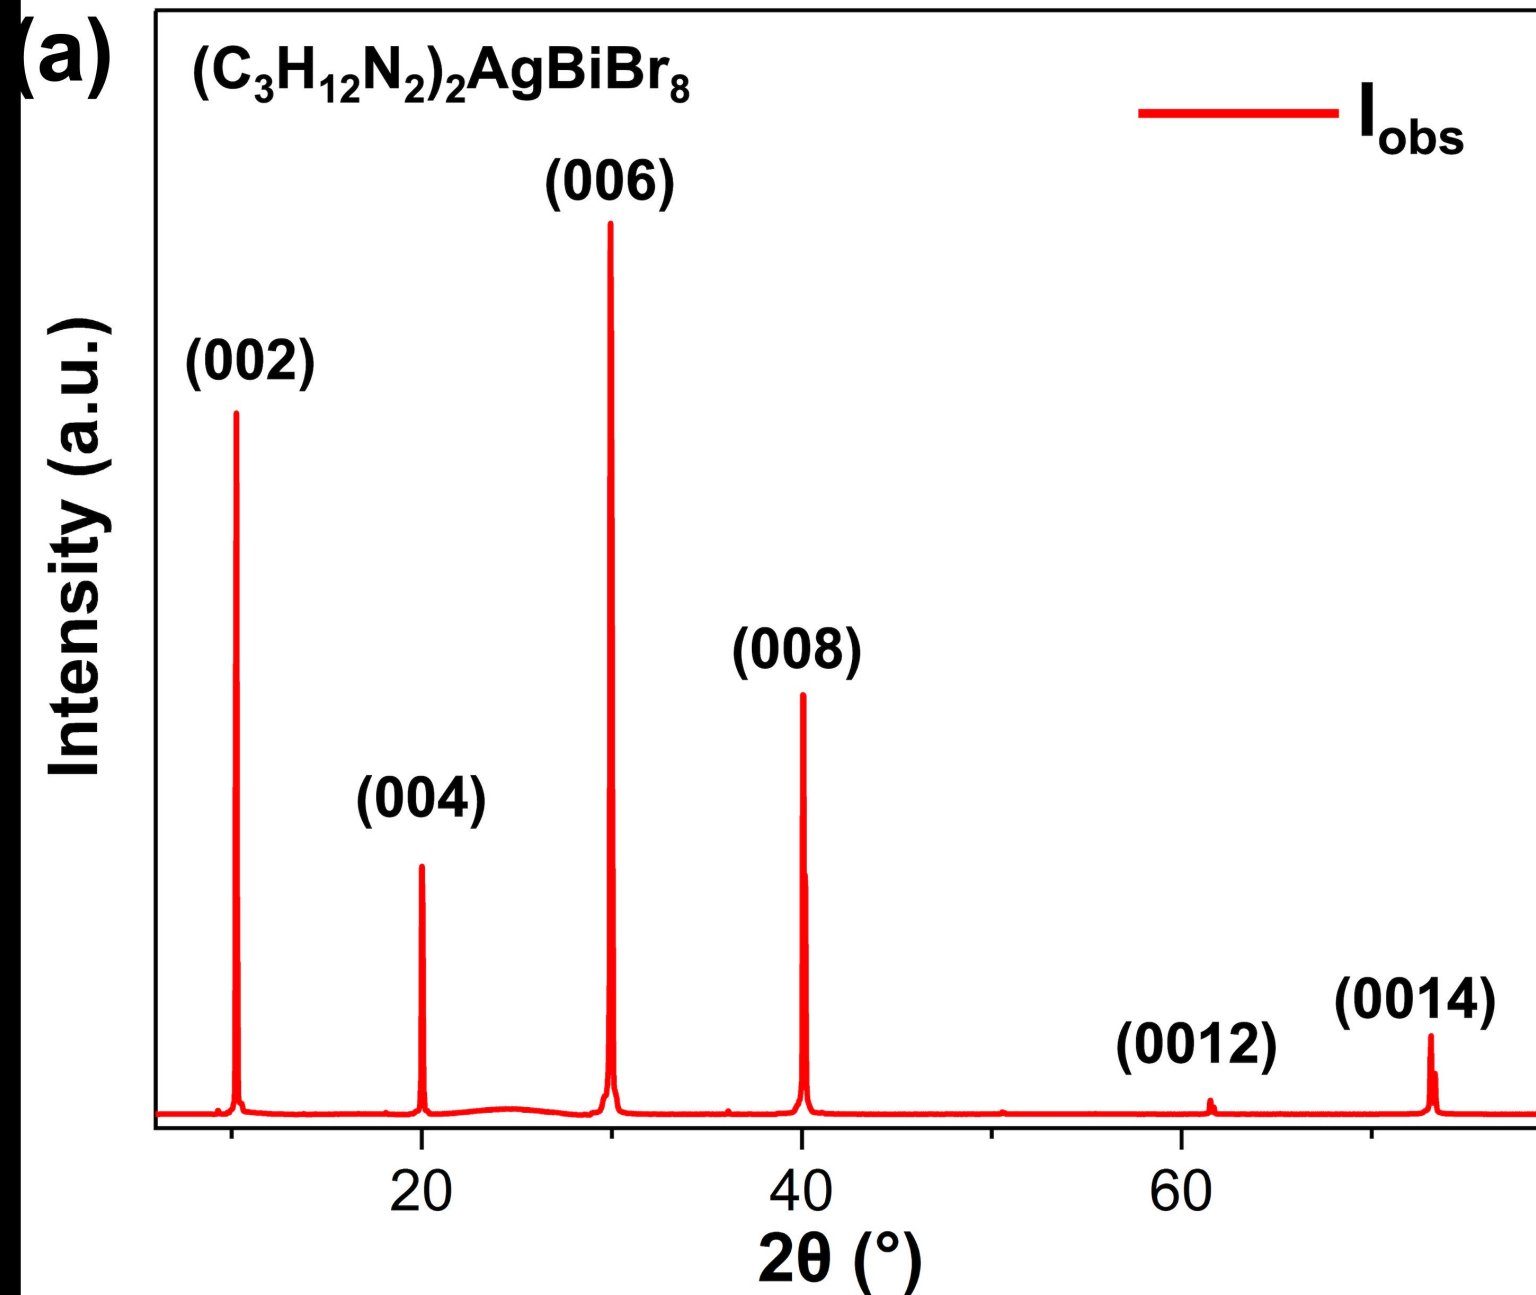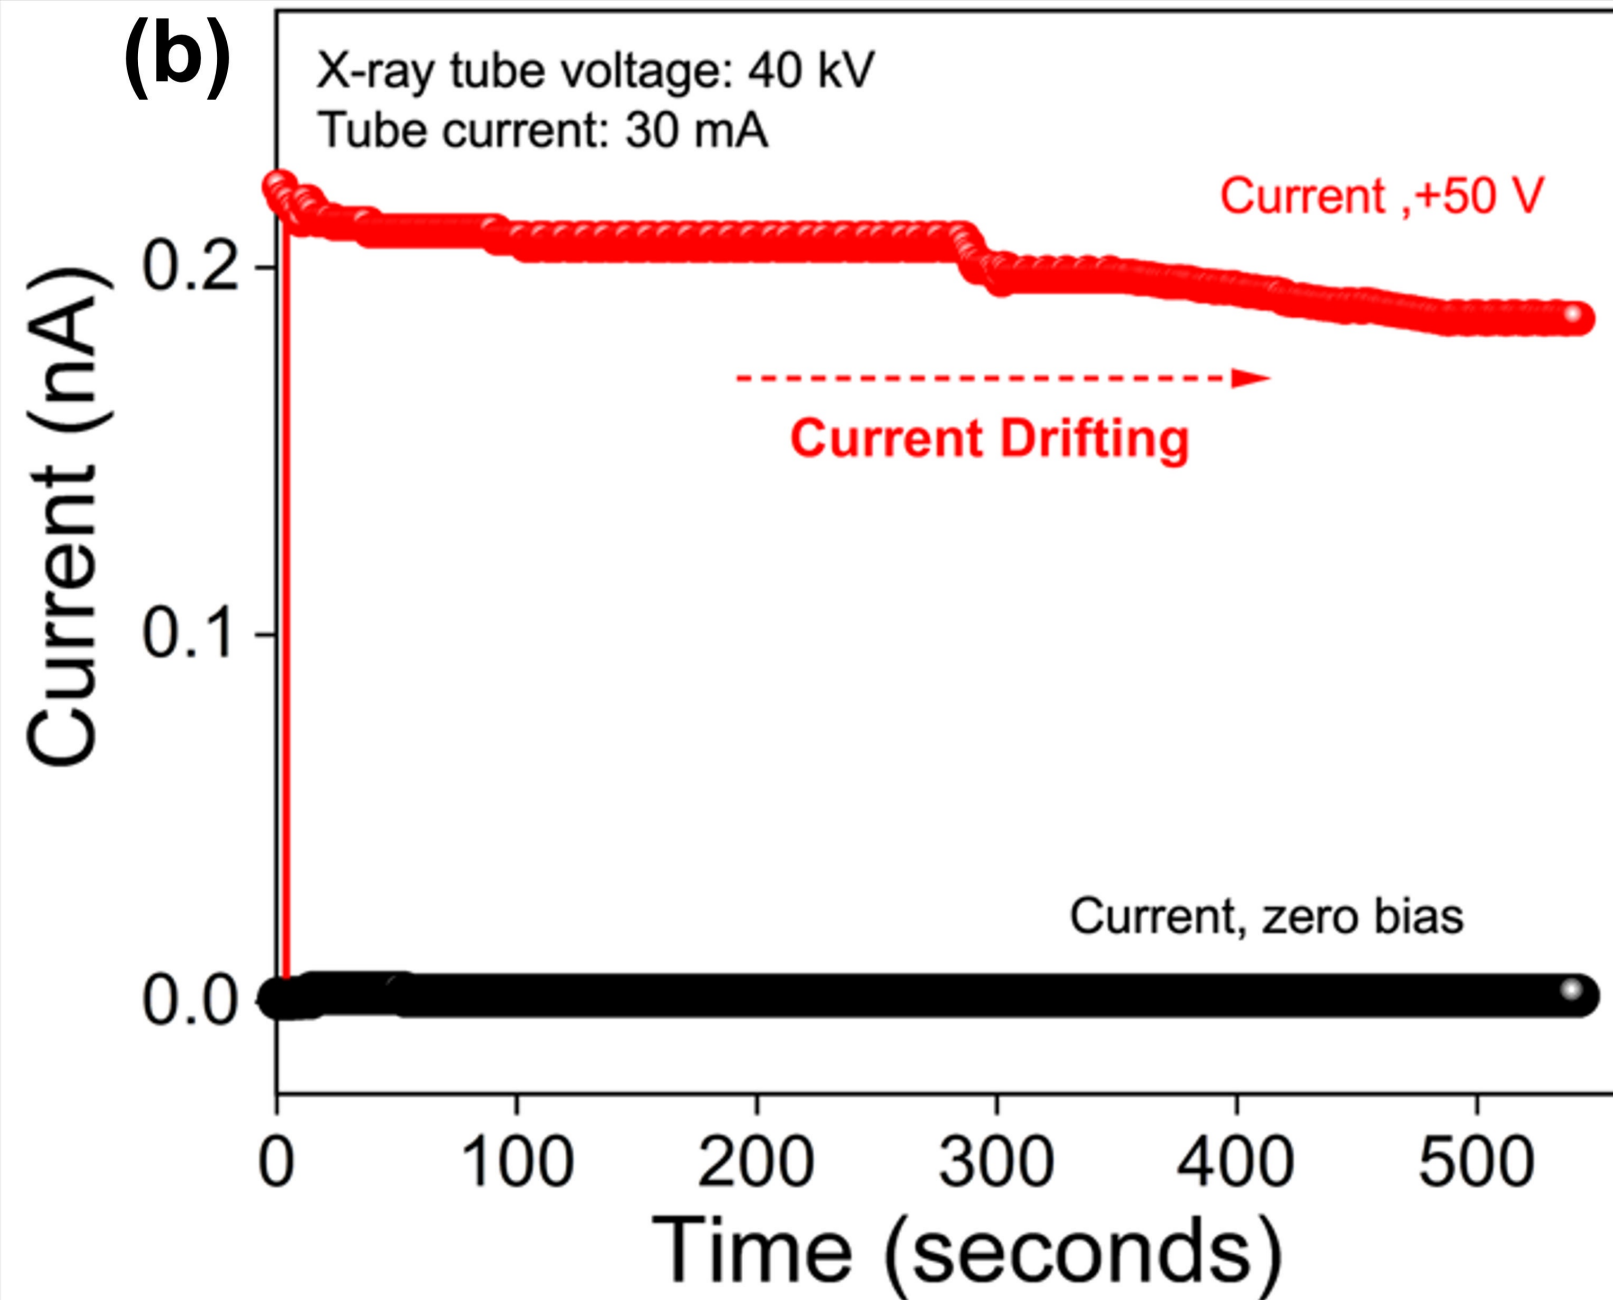

Supplement: d6ce00175k7.pdf [file d6ce00175k7.pdf]

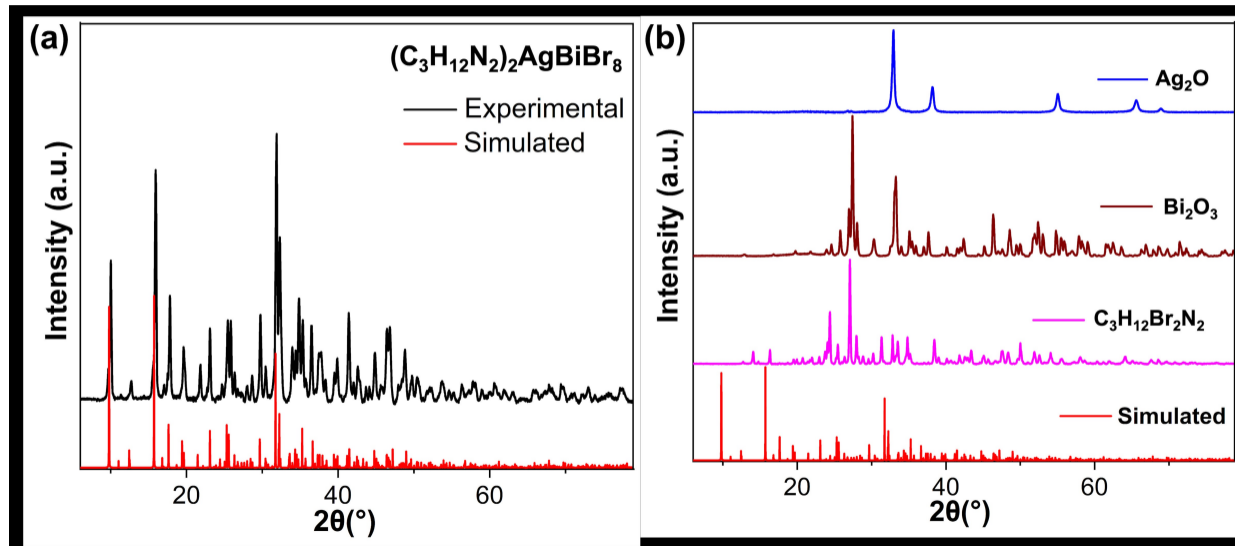

Supplement: d6ce00175k8.pdf [file d6ce00175k8.pdf]

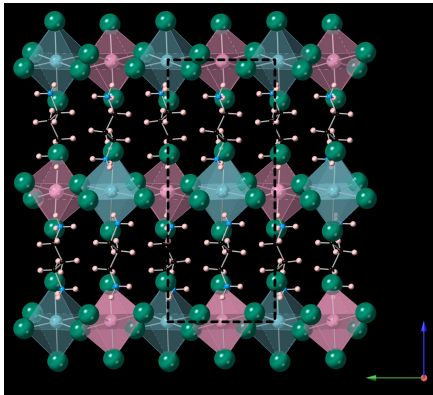

Supplement: d6ce00175k9.pdf [file d6ce00175k9.pdf]
